# Supplementary material for: LYL1 is critical for adult hematopoietic stem cell-derived B and T lymphopoiesis
Source: Research Square preprint supplement (doi:10.21203/rs.3.rs-7901302/v1), 2025-10-21
Supplement: Supplementary file 1 [file 9eae167ada6c11f667663a26.docx]

**LYL1 is critical for adult hematopoietic stem cell-derived B and T lymphopoiesis**

Chiu SK, *et al*.

**SUPPLEMENTARY FIGURES…………………………………………………...…………..……………2**

Supplementary Figure 1. Loss of *Lyl1* on hematopoiesis in adult mice……………………….…….…2

Supplementary Figure 2. Hematopoietic phenotype of *Lyl1* deletion in adult HSPCs…………..……..3

**Supplementary Figures**

**
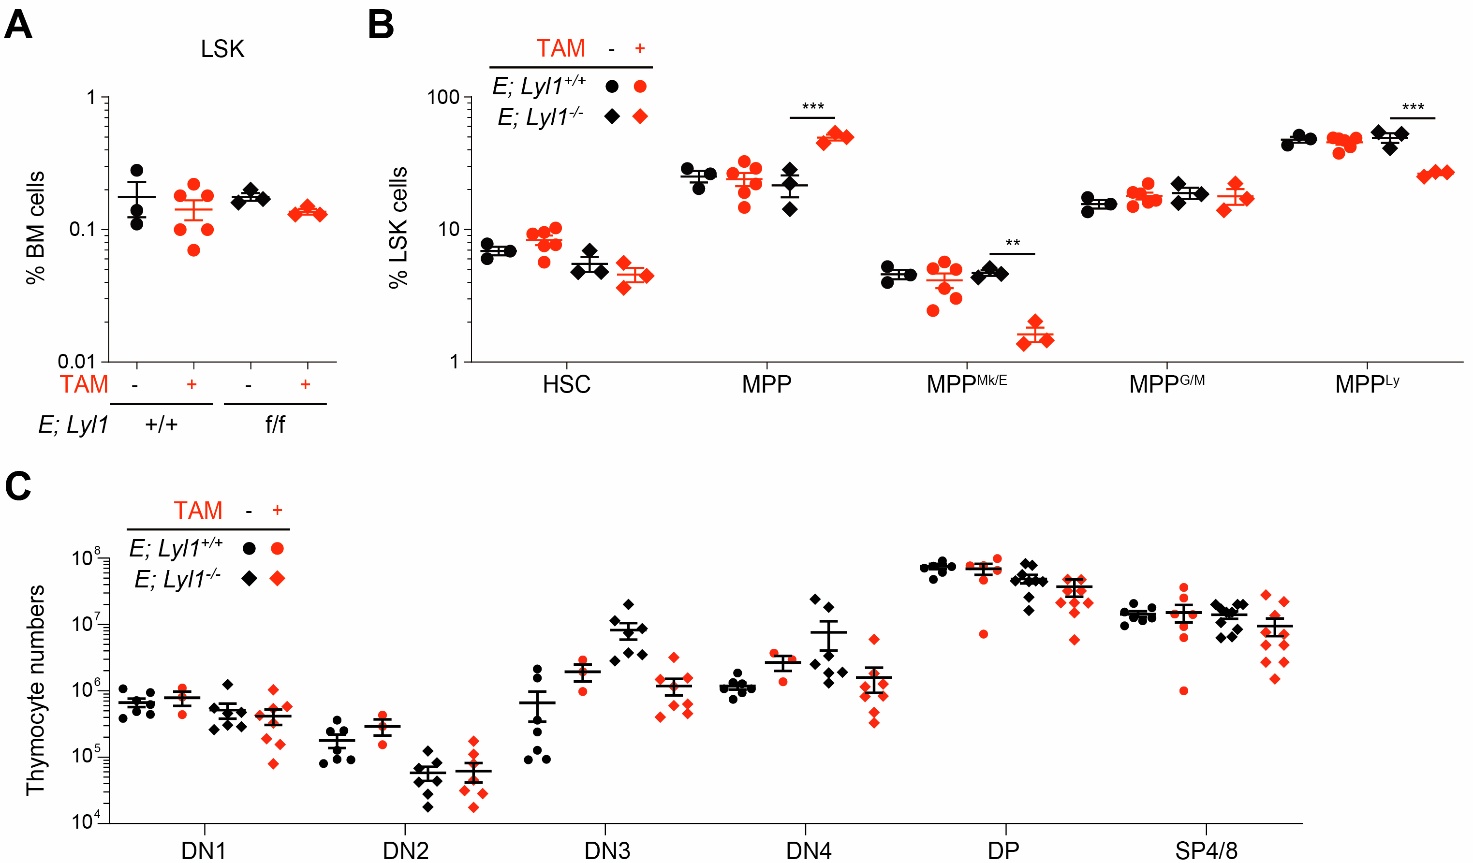
**

**Supplementary Figure 1. Loss of *Lyl1* on hematopoiesis in adult mice.** Proportion of the Lineage-negative Sca-1- and Kit-positive (LSK) cells (**A**), and tthe different subsets of hematopoietic stem and progenitors (HSPC) in the LSK population (**B**), in the bone marrow (BM) of *E; Lyl1+/+* (control) and *E;**Lyl1*f/f (*Lyl1*cKO) mice four weeks after treatment with tamoxifen (TAM). Hematopoietic stem cell (HSC) and multipotent progenitor (MPP) populations; megakaryocyte and erythroid biased (MPPMk/E), lymphoid-primed (MPPLy), and myeloid/granulocyte and monocyte biased (MPPG/M) MPP populations. Mean ± S.E.M., 2-way ANOVA with Tukey’s correction test; ***P*<0.01 and ****P*<0.001 compared to vehicle-treated controls. **C**, Absolute numbers of T-cell populations in the thymus of mice four weeks post-TAM treatment. CD4-CD8- double-negative (DN); CD4+CD8+ double-positive (DP), CD4+/CD8+ single-positive (SP4/8) populations. Mean ± S.E.M., 2-way ANOVA with Tukey’s correction test; compared to vehicle-treated controls.

**
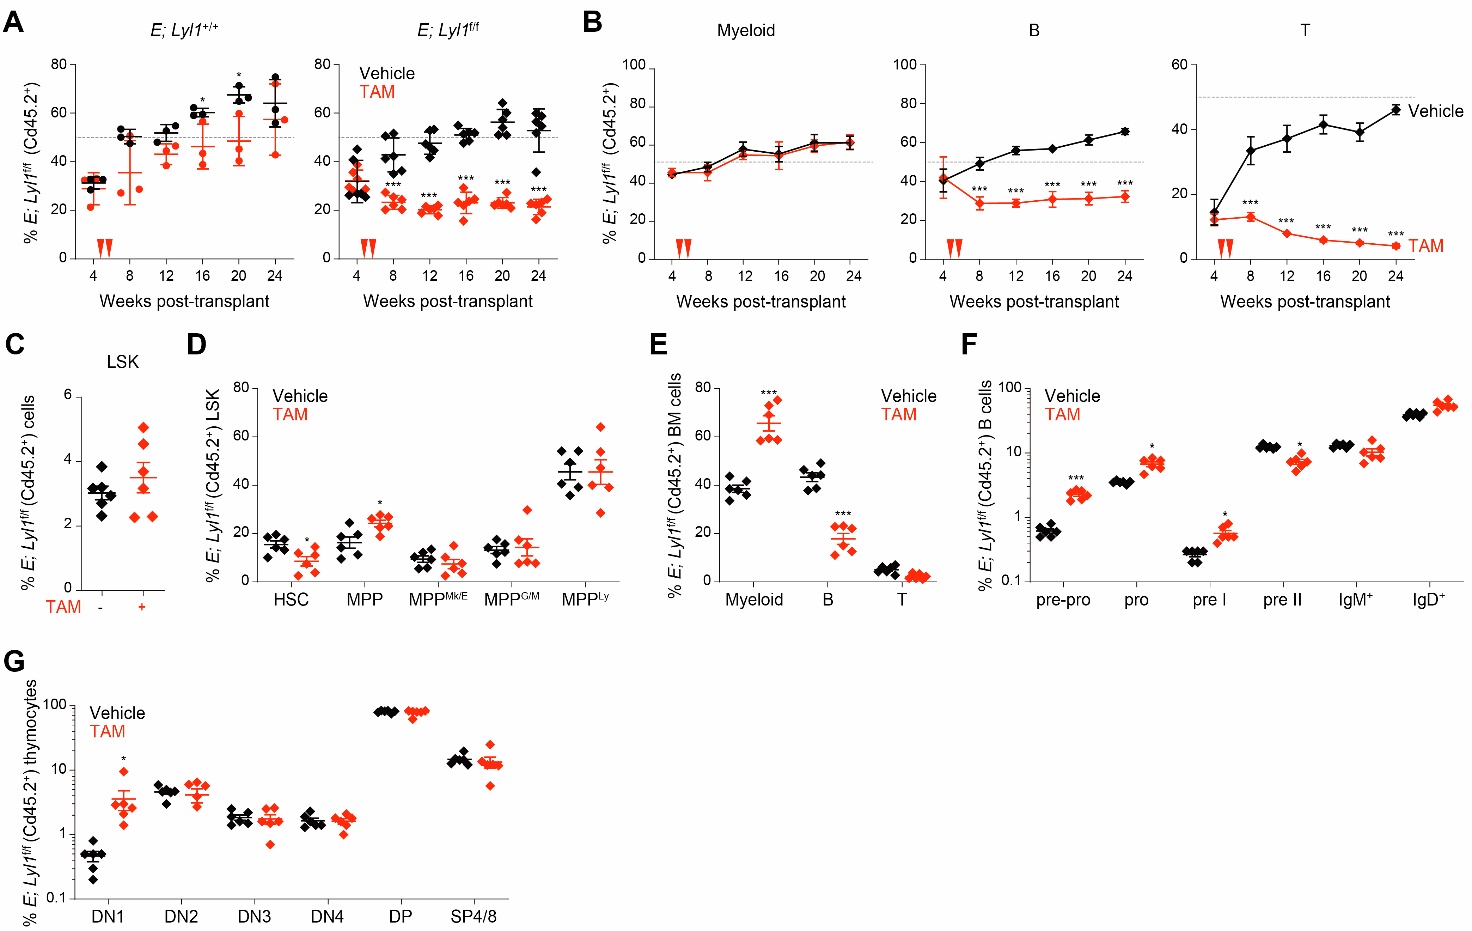
**

**Supplementary Figure 2. Hematopoietic phenotype of *Lyl1* deletion in adult HSPCs. A**, Longitudinal assessment of the relative representation (%) of donor-derived (Cd45.2+) cells in the peripheral blood of recipients transplanted with bone marrow (BM) of *E; Lyl1+/+* (control) and *E;**Lyl1*f/f (*Lyl1*cKO) mice. Dashed line represents 50% engraftment. **B-C**, Proportion (%) of *E;**Lyl1*f/f Lineage-negative Sca-1- and Kit-positive (LSK) cells (**B**), and tthe different subsets of hematopoietic stem and progenitor cells in the LSK population (**C**), from the BM of recipients at twenty-four weeks after transplantation. **D-E**, Percentage of *E;**Lyl1*f/f mature myeloid, B- and T-cells in the peripheral blood over time (**D**) and in the BM at twenty-four weeks after transplantation (**E**). Dashed line represents 50% engraftment. **F-G**, Relative representation (%) of donor-derived *E;**Lyl1*f/f B-cell populations in the BM (**F**), and T-cell populations in the thymus (**G**) of recipients at twenty-four weeks after transplantation. Tamoxifen (TAM); hematopoietic stem cell (HSC) and multipotent progenitor (MPP) populations; megakaryocyte and erythroid biased (MPPMk/E), lymphoid-primed (MPPLy), and myeloid/granulocyte and monocyte biased (MPPG/M) MPP populations; CD4-CD8- double-negative (DN); CD4+CD8+ double-positive (DP), CD4+/CD8+ single-positive (SP4/8) populations. Mean ± S.E.M., 2-way ANOVA with Tukey’s correction test; **P*<0.05, ***P*<0.01 and ****P*<0.001 compared to vehicle-treated controls.
